# Supplementary material for: Site-selective biomineralization of native biological membranes
Source: Royal Society of Chemistry journal article supplement (doi:10.1039/c4tb00468j), 2014-01-01
Supplement: c4tb00468j1.pdf [file c4tb00468j1.pdf]

## Supplementary information

Silification experiments with PM-wildtype (0.2 eq, 0.4 eq, 0.8 eq TEOS)

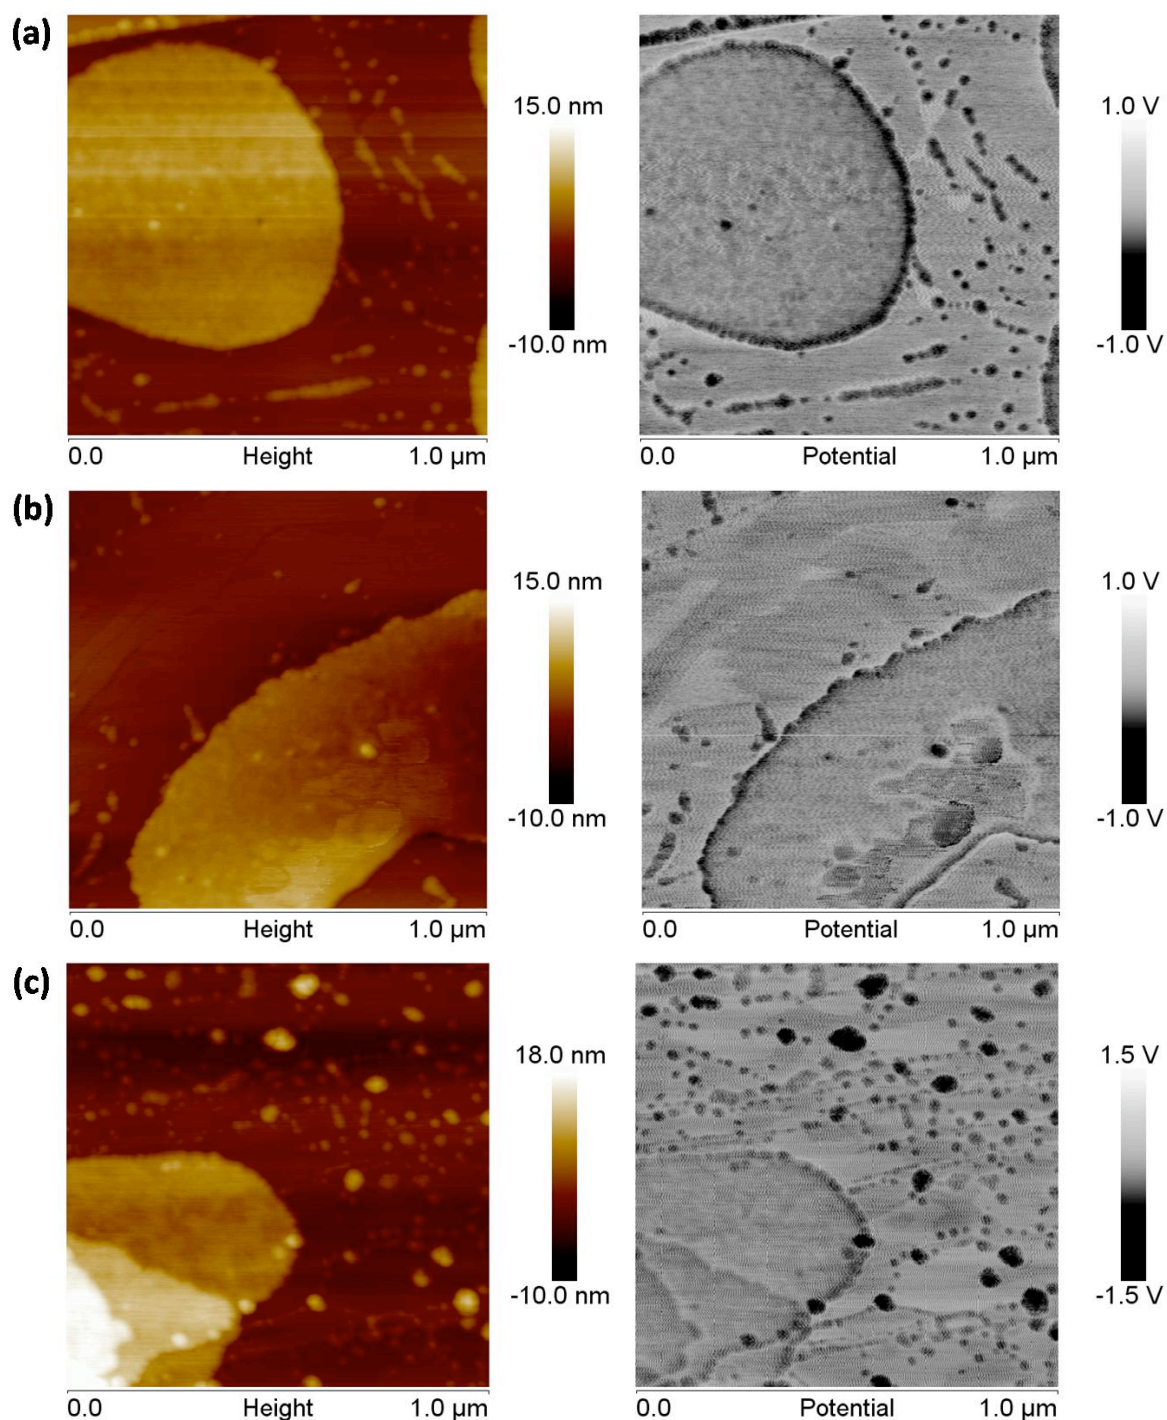

**Supporting Figure S1:** a) AFM (left) and EFM (right) image of PM-WT with 0.2 eq TEOS on highly oriented pyrolytic graphite (HOPG). b) PM-WT with 0.4 eq TEOS and c) PM-WT with 0.8 eq TEOS. Negatively charged silica nanoparticles are found in the vicinity of but not on the PM-WT.
